# Supplementary material
Source: publisher site journal article supplement (https://www.dovepress.com/article/338609)
Supplement: Supplementary file 1 [file get_supplementary_file.php]

Supporting Information

**Templated Three-dimensional Engineered** **Bone Matrix as a Model** **for** **Breast Cancer** **Osteolytic** **Bone Metastasis Process**

Manman Sun1, Ke Huang1, Xueshi Luo2,3 *, and Hong Li1, *

1 Department of Materials Science and Engineering, College of Chemistry and Materials Science, Jinan University, Guangzhou, Guangdong, People’s Republic of China

2 The First Affiliated Hospital of Jinan University, Jinan University, Guangzhou, Guangdong, People’s Republic of China

3 Department of Chemistry, College of Chemistry and Materials Science, Jinan University, Guangzhou, Guangdong, People’s Republic of China

***Correspondence: Xueshi Luo; Hong Li

Jinan University, No. 601, West Huangpu Avenue, Guangzhou, Guangdong, 510632, People’s Republic of China

Tel.: +86 020 85223062

Fax: +86 020 85223271

E-mail: [1254914942@qq.com](mailto:1254914942@qq.com) (Xueshi Luo); [tlihong@jnu.edu.cn](mailto:tlihong@jnu.edu.cn) (Hong Li)


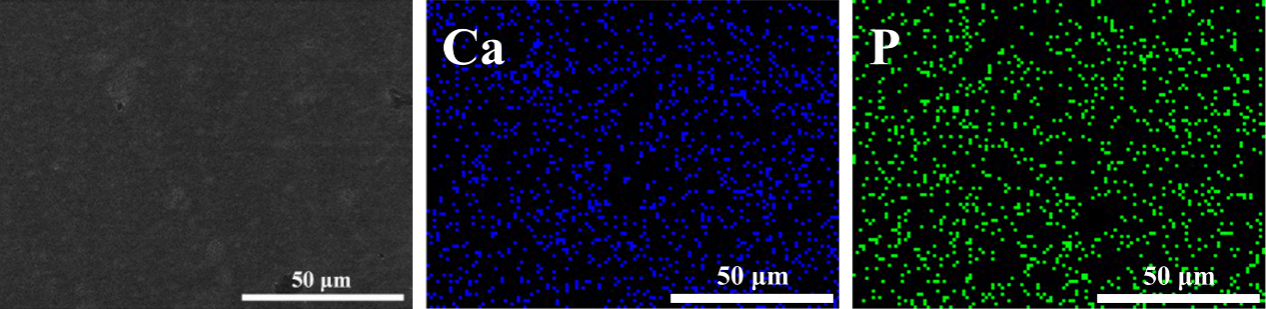


**Figure S1** Energy Dispersive Spectrometer (EDS) analysis of Ca and P elements in the bone-like matrix.

Energy Dispersive Spectrometer (EDS), the accessory for microanalysis of components of scanning electron microscope (SEM, PXL30, Philips, Netherlands) was used to scan the microarea of the bone-like matrix and analyze the distribution of Ca and P elements. The result proved the existence of inorganic minerals and their uniform distribution among the formed matrix.


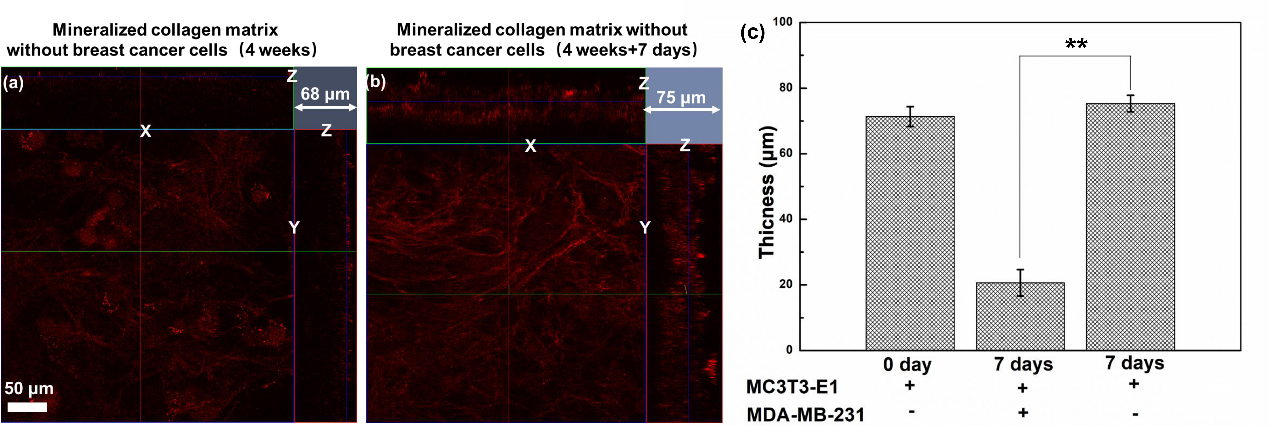


**Figure S2**. Characterization of the engineered bone matrix with/without breast cancer cells co-culturing for 7 days. (**a, b**) 2D section morphologies of mineralized bone matrix without breast cancer cells on Day 7 (Col I immunofluorescence staining in red) via LCSM; (**c**) The thickness of the matrix co-cultured with/without breast cancer cells for 7 days. Data are expressed as means ± standard deviation (n = 3). ns=p>0.05/*p<0.05/**p<0.01/*** p<0.001.
